# Supplementary material for: Differential roles of microglia and monocytes in the inflamed central nervous system
Source: PubMed Central journal article supplement — J Exp Med. 2014 Jul 28;211(8):1533–49. doi: 10.1084/jem.20132477 (PMC4113947; doi:10.1084/jem.20132477), 2014-07-28
Supplement: supp_jem.20132477_JEM_20132477_sm.pdf [file supp_jem.20132477_JEM_20132477_sm.pdf]

Yanasaki et al., <http://www.jem.org/cgi/content/full/jem.20132477/DC1>**Table S1.** Inflammatory signature in resident microglia versus recruited monocytes

| Gene           | Naive     | Onset     | Peak      | Recovery  | Naive     | Onset     | Peak      | Recovery  |
|----------------|-----------|-----------|-----------|-----------|-----------|-----------|-----------|-----------|
|                | Microglia | Microglia | Microglia | Microglia | Monocytes | Monocytes | Monocytes | Monocytes |
| <i>Ccl24</i>   | 1.909003  | -0.55798  | -0.55798  | -0.39951  | -0.55798  | -0.55798  | -0.55798  | 1.280392  |
| <i>Myl2</i>    | 2.330298  | -0.54299  | -0.54299  | 0.088634  | -0.54299  | -0.54299  | -0.54299  | 0.296041  |
| <i>Masp1</i>   | 1.962826  | -0.6656   | -0.6656   | 0.696042  | -0.6656   | -0.6656   | -0.6656   | 0.669127  |
| <i>Tlr5</i>    | 1.917264  | -0.83659  | -0.83659  | 0.543576  | -0.83659  | -0.51225  | -0.22394  | 0.785125  |
| <i>Nfatc3</i>  | 2.05328   | -1.11423  | -0.38602  | 0.033105  | -1.02529  | -0.22992  | 0.514137  | 0.154938  |
| <i>Rock2</i>   | 1.853727  | -0.07678  | 0.136116  | 1.039644  | -0.87307  | -0.72591  | -1.03248  | -0.32124  |
| <i>Prkca</i>   | 1.620126  | -0.15765  | 0.112904  | 1.385165  | -0.89253  | -0.84737  | -0.89253  | -0.32811  |
| <i>Ly96</i>    | 1.710855  | -0.39161  | 0.237818  | 1.29084   | -1.00159  | -0.64816  | -0.43217  | -0.76597  |
| <i>Tgfb1</i>   | 1.832447  | -0.36704  | 0.529286  | 0.987439  | -0.8868   | -0.67987  | -0.73803  | -0.67742  |
| <i>Mef2c</i>   | 1.880298  | -0.08797  | 0.561848  | 0.788334  | -0.9131   | -0.68729  | -0.88154  | -0.66058  |
| <i>Mapk14</i>  | 1.897814  | -0.40819  | 0.638794  | 0.677161  | -1.09991  | -0.73843  | -0.75028  | -0.21696  |
| <i>Il6ra</i>   | 1.970317  | -0.53361  | 0.779907  | 0.521994  | -0.81044  | -0.71918  | -0.75864  | -0.45035  |
| <i>Nr3c1</i>   | 2.00946   | -0.49857  | 0.836238  | 0.378577  | -0.62729  | -0.74329  | -0.73556  | -0.61956  |
| <i>Mapk1</i>   | 1.866316  | -0.44738  | 0.749204  | 0.6398    | -0.5515   | -0.67189  | -0.38296  | -1.20159  |
| <i>Nfkb1</i>   | 1.946122  | -0.64884  | 0.468212  | 0.587622  | -1.10897  | -0.04461  | -0.22839  | -0.97114  |
| <i>Tgfb1</i>   | 2.11258   | -0.69729  | 0.266905  | 0.499968  | -1.17074  | -0.41112  | -0.36993  | -0.23036  |
| <i>Map2k1</i>  | 1.868357  | -0.81986  | 0.239292  | 0.501229  | -1.57101  | -0.19421  | 0.094214  | -0.11802  |
| <i>Rac1</i>    | 1.742166  | -0.67278  | 0.833578  | 0.32305   | -1.42362  | -0.79257  | 0.165518  | -0.17534  |
| <i>Tollip</i>  | 1.447093  | -0.63037  | 0.68051   | 0.93929   | -1.66449  | -0.49062  | 0.096322  | -0.37774  |
| <i>Gnaq</i>    | 1.551583  | -0.20587  | 0.642683  | 0.872168  | -1.70556  | -0.42543  | -0.26373  | -0.46585  |
| <i>Mapk3</i>   | 1.690993  | -0.16904  | 0.593837  | 0.886278  | -1.45081  | -0.72637  | -0.43659  | -0.3883   |
| <i>Cltc</i>    | 1.730602  | -0.18589  | 0.627018  | 0.874545  | -1.35857  | -0.65448  | -0.5648   | -0.46842  |
| <i>Il10rb</i>  | 1.602112  | -0.22689  | 0.678573  | 0.983367  | -1.42897  | -0.51029  | -0.70585  | -0.39205  |
| <i>Nfe2l2</i>  | 0.899319  | -0.14332  | 0.622124  | 0.963333  | -2.12062  | 0.349733  | -0.47704  | -0.09354  |
| <i>Grb2</i>    | 1.352309  | -0.28034  | 1.088337  | 0.409301  | -1.81954  | 0.046521  | -0.16323  | -0.63336  |
| <i>Rhoa</i>    | 1.287835  | -0.16301  | 0.288328  | 0.244591  | -2.18375  | 0.375843  | 0.429102  | -0.27894  |
| <i>Cdc42</i>   | 1.457401  | -0.622    | 0.19096   | -0.11576  | -1.33483  | 0.259222  | 1.217549  | -1.05255  |
| <i>Gusb</i>    | 0.406037  | 1.396543  | 0.850172  | 0.734025  | -1.52339  | -0.3918   | -0.55384  | -0.91775  |
| <i>Tlr1</i>    | 0.337562  | 0.664201  | 0.889306  | 1.417898  | -1.54659  | -0.31755  | -0.95376  | -0.49106  |
| <i>PRKCB</i>   | 0.816591  | 0.836349  | 0.89579   | 1.088731  | -1.21007  | -0.87771  | -1.09928  | -0.4504   |
| <i>Tlr3</i>    | 0.864465  | 0.828436  | 0.903346  | 1.086529  | -1.19992  | -0.64789  | -1.03303  | -0.80194  |
| <i>C1qa</i>    | 0.709938  | 0.570126  | 1.322304  | 1.01929   | -1.15123  | -0.71944  | -0.93715  | -0.81383  |
| <i>C1qb</i>    | 0.674612  | 0.620622  | 1.40293   | 0.900075  | -1.21785  | -0.71568  | -0.84645  | -0.81826  |
| <i>Mef2a</i>   | 1.336077  | -0.16994  | 0.902325  | 1.232798  | -1.01726  | -0.7548   | -0.56677  | -0.96242  |
| <i>Tlr7</i>    | 1.382319  | 0.214124  | 1.277323  | 0.569155  | -1.15256  | -0.75862  | -0.83948  | -0.69227  |
| <i>Ripk2</i>   | 1.313126  | 0.383853  | 0.482694  | 1.161682  | -1.54379  | -0.51148  | -0.83534  | -0.45075  |
| <i>Tlr4</i>    | 1.341356  | 0.278342  | 0.485758  | 1.116428  | -1.44461  | -0.06338  | -0.65534  | -1.05855  |
| <i>Tlr6</i>    | 1.421659  | -0.09855  | 0.755498  | 0.943346  | -1.47896  | 0.078294  | -0.79117  | -0.83011  |
| <i>Il18</i>    | 1.485824  | 0.883104  | 0.019148  | 0.896842  | -1.1686   | -0.35677  | -0.59095  | -1.1686   |
| <i>Creb1</i>   | 1.277467  | -0.52413  | 0.162282  | 1.623152  | -0.03019  | -1.03769  | -1.10486  | -0.36603  |
| <i>Il6</i>     | 1.405376  | -0.67257  | -0.12612  | 1.7553    | -0.67257  | -0.67257  | -0.67257  | -0.34427  |
| <i>Map3k5</i>  | 1.691527  | -0.79826  | 0.043606  | 1.268208  | -0.70436  | -0.91347  | -0.73424  | 0.146989  |
| <i>Rps6ka5</i> | 1.33496   | -0.74153  | -0.53616  | 1.610987  | -0.51804  | -0.83539  | -0.77769  | 0.462856  |
| <i>Pdgfa</i>   | 0.768275  | -0.48962  | -0.34125  | 1.99      | -0.51698  | -0.91043  | -0.91043  | 0.410427  |
| <i>Ripk1</i>   | 1.090231  | -0.30931  | -0.65756  | 1.982101  | -0.85215  | -0.45554  | -0.62552  | -0.17226  |
| <i>Keap1</i>   | 1.540685  | 0.158032  | -0.37098  | 1.321657  | -1.22285  | -0.19932  | -1.07663  | -0.15059  |
| <i>Raf1</i>    | 1.882778  | -0.92271  | -0.33279  | 1.031995  | -1.04688  | -0.05929  | -0.57283  | 0.019721  |
| <i>Pla2g4a</i> | 1.175092  | 0.895921  | -0.49401  | 1.18995   | -0.60873  | -0.86699  | -1.42041  | 0.129167  |

Values are relative (centered and normalized for heat map visualization by MeV) expression for each gene.
